# Supplementary material for: Antitumor activity of Dendrobium devonianum polysaccharides based on their immunomodulatory effects in S180 tumor-bearing mice
Source: Royal Society of Chemistry journal article supplement (doi:10.1039/c6ra03074b), 2016-01-01
Supplement: c6ra03074b1.pdf [file c6ra03074b1.pdf]

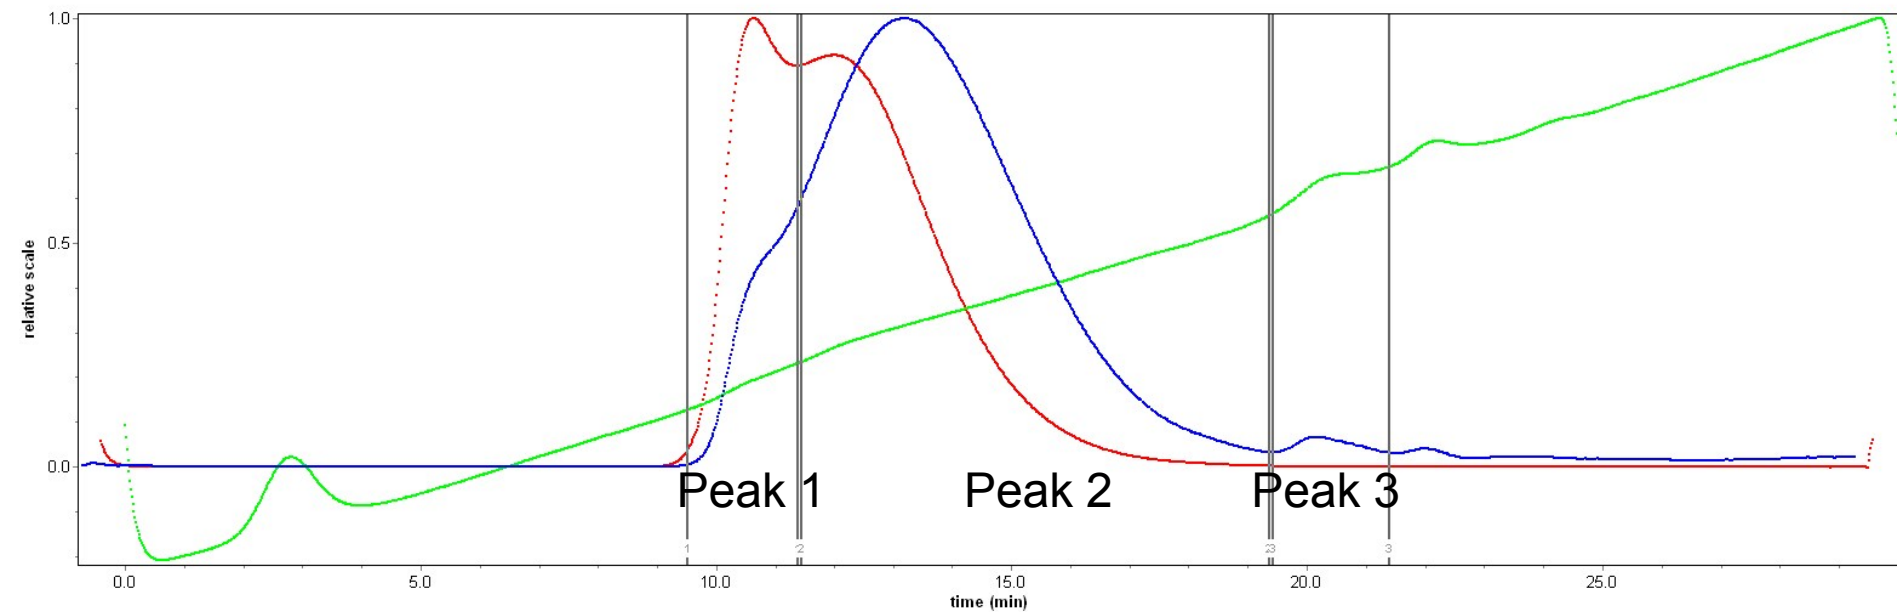

GLP

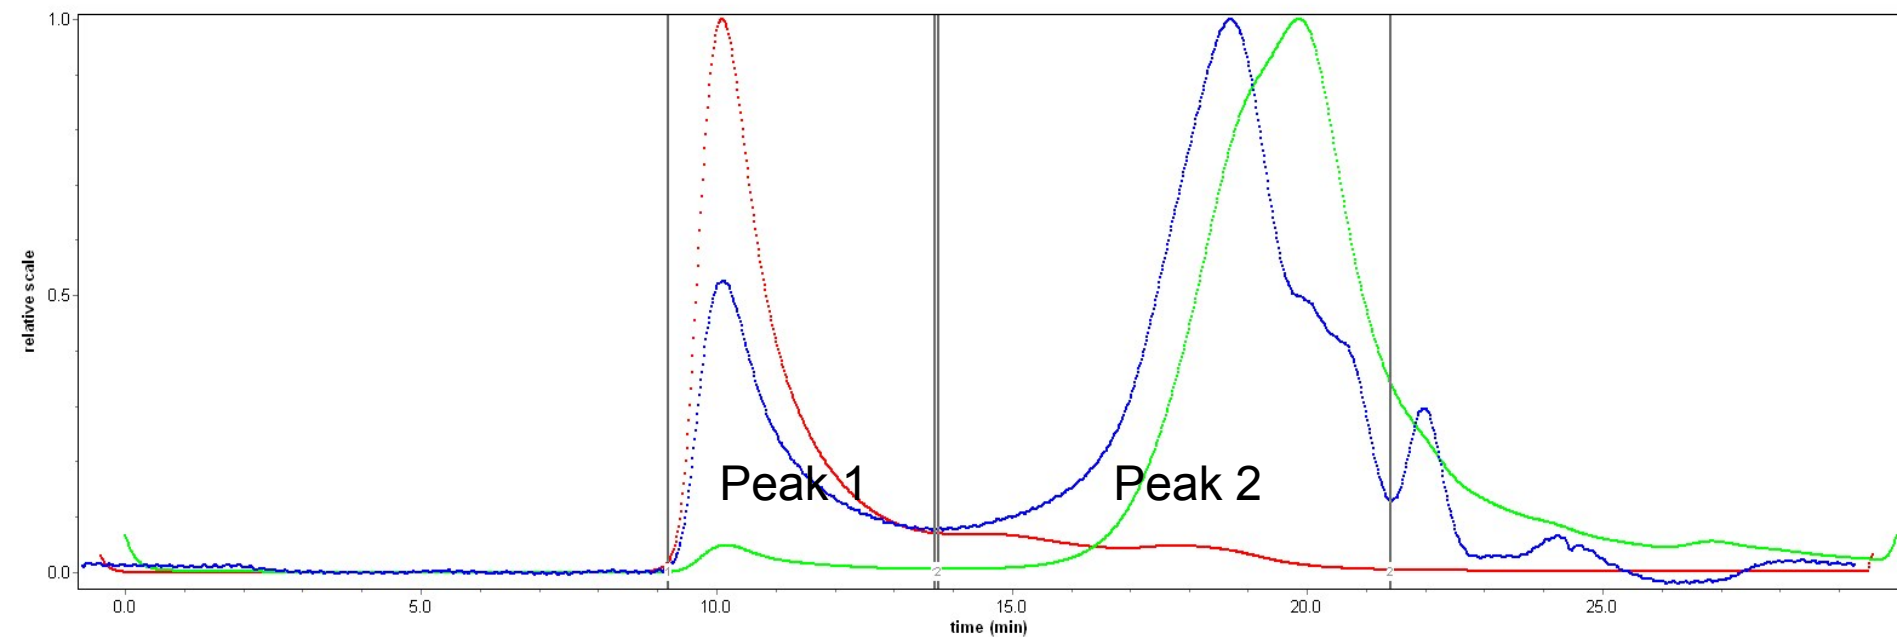

## Supplementary material 2.

Antitumor test of DDP and GLP in Caco-2 and S180 cells *in vitro*

|                               |  | DDP                 | GLP        |
|-------------------------------|--|---------------------|------------|
|                               |  | Inhibition rate (%) |            |
| Caco-2 cells                  |  |                     |            |
| Sample concentrations (μg/mL) |  |                     |            |
| 10                            |  | -2.37±2.41          | -1.11±1.45 |
| 50                            |  | 1.69±2.02           | -0.98±1.09 |
| 100                           |  | -1.64±1.95          | -0.68±1.53 |
| 200                           |  | 0.07±1.18           | 1.07±2.01  |
| 500                           |  | -2.42±2.19          | 1.37±1.82  |
| S180 cells                    |  |                     |            |
| Sample concentrations (μg/mL) |  |                     |            |
| 10                            |  | 1.25±1.23           | -1.25±1.84 |
| 50                            |  | -1.38±0.98          | -2.08±2.02 |
| 100                           |  | -0.78±1.66          | 1.17±1.64  |
| 200                           |  | -1.08±1.47          | -1.07±1.11 |
| 500                           |  | 2.04±2.15           | 2.14±1.91  |

Means expressed with SD were determined in triplicate for each cultivar.
